# Supplementary material for: Fractional-Order Boosted Jellyfish Search Optimizer with Gaussian Mutation for Income Forecast of Rural Resident
Source: Comput Intell Neurosci. 2022 Jun 13;2022:3343505. doi: 10.1155/2022/3343505 (PMC9208948; doi:10.1155/2022/3343505)
Supplement: Supplementary Materials — The Matlab Code of the proposed FOGJS. [file 3343505.f1.txt]

%%  JS optimizer  

function [u,fval,NumEval,fbestvl]=FOGJS(CostFunction,Lb,Ub,nd,para);
%% Problem Definition
nVar=nd;                           % Number of Decision Variables
VarSize=[1 nVar];                  % Size of Decision Variables Matrix
if length(Lb)==1
    VarMin=Lb.*ones(1,nd);         % Lower Bound of Variables for say lb = -5 varmin = [-5 -5 -5 -5 -5]
    VarMax=Ub.*ones(1,nd);         % Upper Bound of Variables
else
    VarMin=Lb;
    VarMax=Ub;
end
%% AJS Parameters
MaxIt = para(1);%10000;        % Maximum Number of Iterations
nPop = para(2);%50;           % Population Size
% initialization using Logistic map using Eq. (18)
popi=initialization(nPop,nd,VarMax,VarMin);
v_3=zeros(nPop,nd);
v_2=zeros(nPop,nd);
v_1=zeros(nPop,nd);
alfa=0.6;
% Evalue population
for i=1:nPop
    popCost(i) = CostFunction(popi(i,:));
end
%% AJS Main Loop
for it=1:MaxIt
    Meanvl=mean(popi,1); % M = mean(A,dim)
    [value,index]=sort(popCost);
    BestSol=popi(index(1),:);
    BestCost=popCost(index(1));
    for i=1:nPop
        % Calculate time control c(t) using Eq. (17);
        Ar=(1-it*((1)/MaxIt))*(2*rand-1);
        if abs(Ar)>=0.5
            %% Folowing to ocean current using Eq. (11)
%              newsol = popi(i)+ rand(VarSize).*(BestSol - 3*rand*Meanvl);
             newsol =alfa*popi(i) + (1/2)*alfa*v_1(i) + (1/6)*alfa*(1-alfa)*v_2(i) + ...
                        (1/24)*alfa*(1-alfa)*(2-alfa)*v_3(i) + rand(VarSize).*(BestSol - 2*rand*Meanvl);
             v_3(i)=v_2(i);
             v_2(i)=v_1(i);
             v_1(i)=popi(i);
            % Check the boundary using Eq. (19)
            newsol = simplebounds(newsol,VarMin,VarMax);
            % Evaluation
            newsolCost = CostFunction(newsol);
            % Comparision
            if newsolCost<popCost(i)
                popi(i,:) = newsol;
                popCost(i)=newsolCost;
                if popCost(i) < BestCost
                    BestCost =popCost(i);
                    BestSol = popi(i,:);
                end
            end
        else
            %% Moving inside swarm
            if rand<=(1-Ar)
                % Determine direction of jellyfish by Eq. (15)
                j=i;
                while j==i
                    j=randperm(nPop,1);
                end
                Step = popi(i,:) - popi(j,:);
                if popCost(j) < popCost(i)
                    Step = -Step;
                end
                % Active motions (Type B) using Eq. (16)
                newsol = popi(i,:) + rand(VarSize).*Step;
%                 newsol =alfa*popi(i) + (1/2)*alfa*v_1(i) + (1/6)*alfa*(1-alfa)*v_2(i) + ...
%                         (1/24)*alfa*(1-alfa)*(2-alfa)*v_3(i) + rand(VarSize).*Step;
%                  v_3(i)=v_2(i);
%                  v_2(i)=v_1(i);
%                  v_1(i)=popi(i);
            else
                % Passive motions (Type A) using Eq. (12)
%                 newsol = popi(i,:) + 0.1*(VarMax-VarMin)*rand;
                newsol =alfa*popi(i) + (1/2)*alfa*v_1(i) + (1/6)*alfa*(1-alfa)*v_2(i) + ...
                        (1/24)*alfa*(1-alfa)*(2-alfa)*v_3(i) + 0.4*(VarMax-VarMin)*rand;
                 v_3(i)=v_2(i);
                 v_2(i)=v_1(i);
                 v_1(i)=popi(i);
            end
            % Check the boundary using Eq. (19)
            newsol = simplebounds(newsol, VarMin,VarMax);
            % Evaluation
            newsolCost = CostFunction(newsol);
            % Comparision
            if newsolCost<popCost(i)
                popi(i,:) = newsol;
                popCost(i)=newsolCost;
                if popCost(i) < BestCost
                    BestCost=popCost(i);
                    BestSol = popi(i,:);
                end
            end
        end
      Bestx=popi(i,:).*(1+normrnd(0,1)*rand);  
      best = CostFunction(Bestx);
      if best<popCost(i)
                popi(i,:) = Bestx;
                popCost(i)=best;
                if popCost(i) < BestCost
                    BestCost=popCost(i);
                    BestSol = popi(i,:);
                end
      end
    end
    %% Store Record for Current Iteration
    fbestvl(it)=BestCost;

end
u=BestSol;
fval=fbestvl(it);
NumEval=it*nPop;
end
%% This function is for checking boundary by using Eq. 19
function s=simplebounds(s,Lb,Ub)
ns_tmp=s;
I=ns_tmp<Lb;
% Apply to the lower bound
while sum(I)~=0
    ns_tmp(I)=Ub(I)+(ns_tmp(I)-Lb(I));
    I=ns_tmp<Lb;
end
% Apply to the upper bound
J=ns_tmp>Ub;
while sum(J)~=0
    ns_tmp(J)=Lb(J)+(ns_tmp(J)-Ub(J));
    J=ns_tmp>Ub;
end
% Check results
s=ns_tmp;
end
